# Supplementary material
Source: ML conference proceedings conference paper supplement (https://proceedings.neurips.cc/paper_files/paper/2021/hash/a64c94baaf368e1840a1324e839230de-Abstract.html)
Supplement: Supplementary file 1 [file a64c94baaf368e1840a1324e839230de-Supplemental.zip]

Archive with 3 entries (2 files):
- 898_supplementary/
- 898_supplementary/demo.mp4
- 898_supplementary/supplementary.pdf
